# Supplementary material
Source: PubMed Central journal article supplement (PMC6449190)
Supplement: NIHMS1518644-supplement-11538_2018_563_MOESM2_ESM.pdf [file NIHMS1518644-supplement-11538_2018_563_MOESM2_ESM.pdf]

# Supporting Information

## A Model of $\text{Ca}^{2+}$ Dynamics in an Accurate Reconstruction of Parotid Acinar Cells

Nathan Pages<sup>1,a</sup> · Elías Vera-Sigüenza<sup>1</sup> · Vivien Kirk<sup>1</sup> · John Rugis<sup>1</sup> · David I. Yule<sup>2</sup> · James Sneyd<sup>1</sup>

<sup>1</sup>The University of Auckland, Department of Mathematics,  
Level 2, Building 303, 38 Princes Street, Auckland CBD, New Zealand.

<sup>2</sup>University of Rochester, School of Medicine and Dentistry,  
601 Elmwood Ave, Box 711, Rochester NY, United States of America.

E-mail: [npag780@aucklanduni.ac.nz](mailto:npag780@aucklanduni.ac.nz)

# 1 Equations of the model

Here we present the secretion model applied to five acinar cells. We compute the primary fluid flow rate and their corresponding ionic concentrations. For an in-depth explanation of the results in cell 7 and 4, please refer to the two main papers [Pages et al. \(2018\)](#); [Sigüenza et al. \(2018\)](#). For information related to the construction of the individual cells from experimental data, please refer to the appendix of [Pages et al. \(2018\)](#).

The subscripts,  $e$ ,  $i$ , and  $l$  denote, respectively, the interstitial, intracellular, and luminal compartments.  $S_b$  represents the surface area of the basolateral plasma membrane:  $\partial\Omega_b$  (PM). The apical PM surface area is denoted:  $\partial\Omega_a$ .  $C_m$  and  $F$  are the PM capacitance and Faraday's constant, respectively. These can be found in section 2.11, along with other the parameters of the system. The PM fluxes, denoted by  $j$  and  $J$ , are represented by a mathematical sub-models.

$$\omega_l \frac{d[\text{Na}^+]_l}{dt} = J_{\text{Na}}^t - J_{\text{out}}^w[\text{Na}^+]_l, \quad (1)$$

$$\omega_l \frac{d[\text{K}^+]_l}{dt} = J_K^t - J_{\text{out}}^w[\text{K}^+]_l, \quad (2)$$

$$\omega_l \frac{d[\text{Cl}^-]_l}{dt} = \int_{\partial\Omega_a} j_{\text{Cl}} dS - J_{\text{out}}^w[\text{Cl}^-]_l, \quad (3)$$

$$\frac{d\omega_i}{dt} = J_b^w - J_a^w, \quad (4)$$

$$\frac{d([\text{Na}^+]_i \omega_i)}{dt} = S_b \left( J_{\text{Nkcc1}} - 3J_{\text{NaK}} + J_{\text{Nhe1}} - J_{\text{Ae4}} \right), \quad (5)$$

$$\frac{d([\text{K}^+]_i \omega_i)}{dt} = S_b \left( J_{\text{Nkcc1}} + 2J_{\text{NaK}} \right) - \int_{\partial\Omega_b} j_{\text{K}} dS, \quad (6)$$

$$\frac{d([\text{Cl}^-]_i \omega_i)}{dt} = S_b \left( 2J_{\text{Nkcc1}} + J_{\text{Ae4}} \right) - \int_{\partial\Omega_a} j_{\text{Cl}} dS, \quad (7)$$

$$\frac{d([\text{HCO}_3^-]_i \omega_i)}{dt} = \omega_i J_{\text{Buffer}} - S_b 2J_{\text{Ae4}}, \quad (8)$$

$$\frac{d([\text{H}^+]_i \omega_i)}{dt} = \omega_i J_{\text{Buffer}} - S_b J_{\text{Nhe1}}, \quad (9)$$

$$\begin{aligned} \frac{\partial[\text{Ca}^{2+}]_i}{\partial t} &= D_c \nabla^2 [\text{Ca}^{2+}]_i \quad \dots \\ &+ \frac{\omega_{i0}}{\omega_i} \left( J_{\text{Wav}}([\text{Ca}^{2+}]_{\text{ER}} - [\text{Ca}^{2+}]_i) - J_{\text{SERCA}} \right) - \frac{d\omega_i}{dt} \frac{[\text{Ca}^{2+}]_i}{\omega_i}, \end{aligned} \quad (10)$$

$$\begin{aligned} \frac{\partial[\text{Ca}^{2+}]_{\text{ER}}}{\partial t} &= D_c \nabla^2 [\text{Ca}^{2+}]_{\text{ER}} \quad \dots \\ &- \frac{1}{\gamma(\omega_i)} \left( J_{\text{Wav}}([\text{Ca}^{2+}]_{\text{ER}} - [\text{Ca}^{2+}]_i) - J_{\text{SERCA}} \right), \end{aligned} \quad (11)$$

$$\frac{\partial[\text{IP}_3]_i}{\partial t} = D_p \nabla^2 [\text{IP}_3]_i + \frac{\omega_{i_0}}{\omega_i} \left( V_{PLC} - V_{deg} \right) - \frac{d\omega_i}{dt} \frac{[\text{IP}_3]_i}{\omega_i}, \quad (12)$$

$$\frac{dg}{dt} = (g_\infty - g)/\tau, \quad (13)$$

$$\frac{\partial[\text{Ca}^{2+}]_i}{\partial n} = J_{IPR}([\text{Ca}^{2+}]_{ER} - [\text{Ca}^{2+}]_i) \quad (14)$$

$$\frac{\partial[\text{Ca}^{2+}]_{ER}}{\partial n} = \frac{1}{\gamma(\omega_i)} - J_{IPR}([\text{Ca}^{2+}]_{ER} - [\text{Ca}^{2+}]_i), \quad (15)$$

$$\frac{dh}{dt} = \frac{1}{\tau([\text{Ca}^{2+}]_i)} (h_\infty - h), \quad (16)$$

$$\left( \frac{C_m}{F} \right) \frac{dV_a}{dt} = \int_{\partial\Omega_a} j_{\text{Cl}} dS - \left( J_{\text{K}}^t + J_{\text{Na}}^t \right), \quad (17)$$

$$\left( \frac{C_m}{F} \right) \frac{dV_b}{dt} = - \int_{\partial\Omega_b} j_{\text{K}} dS - S_b J_{\text{NaK}} + \left( J_{\text{K}}^t + J_{\text{Na}}^t \right), \quad (18)$$

## 2 Fluxes of the Model

### 2.1 NaK-ATPase

$$j_{\text{NaK}} = \alpha_{\text{NaK}} \left( r \frac{[\text{K}^+]_e^2 [\text{Na}^+]_i^3}{[\text{K}^+]_e^2 + \alpha [\text{Na}^+]_i^3} \right). \quad (19)$$

| Parameter             | Description              | Value  | Units                            |
|-----------------------|--------------------------|--------|----------------------------------|
| $\alpha_{\text{NaK}}$ | Membrane surface density | 1.6    | amol / $\mu\text{m}^2$           |
| $r$                   | NaK-ATPase rate          | 0.0016 | mM <sup>-3</sup> s <sup>-1</sup> |

### 2.2 Nkcc1 Cotransporter

$$j_{\text{Nkcc1}} = \alpha_{\text{Nkcc1}} \left( \frac{a_1 - a_2 [\text{Na}^+]_i [\text{K}^+]_i [\text{Cl}^-]_i^2}{a_3 + a_4 [\text{Na}^+]_i [\text{K}^+]_i [\text{Cl}^-]_i^2} \right), \quad (20)$$

| Parameter               | Description     | Value                  | Units                            |
|-------------------------|-----------------|------------------------|----------------------------------|
| $a_1$                   | Nkcc1 rate      | 157.55                 | s <sup>-1</sup>                  |
| $a_2$                   | Nkcc1 rate      | $2.009 \times 10^{-5}$ | mM <sup>-4</sup> s <sup>-2</sup> |
| $a_3$                   | Nkcc1 rate      | 1.0306                 | s <sup>-1</sup>                  |
| $a_4$                   | Nkcc1 rate      | $1.38 \times 10^{-6}$  | mM <sup>-4</sup> s <sup>-2</sup> |
| $\alpha_{\text{Nkcc1}}$ | Surface density | 2.15                   | amol/ $\mu\text{m}^2$            |

### 2.3 *Nhe1* Antiporter

$$j_{Nhe1} = G_{Nhe1} \left[ \left( \frac{[H^+]_i}{[H^+]_i + K_H} \right)^2 \left( \frac{[Na^+]_e}{[Na^+]_e + K_{Na}} \right) - \left( \frac{[Na^+]_i}{[Na^+]_i + K_{Na}} \right) \left( \frac{[H^+]_e}{[H^+]_e + K_H} \right)^2 \right]. \quad (21)$$

| Parameter  | Description                            | Value                | Units           |
|------------|----------------------------------------|----------------------|-----------------|
| $K_H$      | Half half maximal $H^+$ concentration  | $4.5 \times 10^{-4}$ | mM              |
| $K_{Na}$   | Half half maximal $Na^+$ concentration | 15                   | mM              |
| $G_{Nhe1}$ | Surface density                        | 0.9                  | amol/ $\mu m^2$ |

### 2.4 *Ae4* Exchanger

$$j_{Ae4} = G_{Ae4} \left( k_+ [Cl^-]_e [HCO_3^-]_i^2 [Na^+]_i - k_- [Cl^-]_i [HCO_3^-]_e^2 [Na^+]_e \right), \quad (22)$$

| Parameter | Description     | Value                | Units            |
|-----------|-----------------|----------------------|------------------|
| $k_+$     | Rate            | $1.9 \times 10^{-2}$ | $mM^{-4} s^{-1}$ |
| $k_-$     | Rate            | $1.3 \times 10^{-5}$ | $mM^{-4} s^{-1}$ |
| $G_{Ae4}$ | Surface density | 1.3                  | amol/ $\mu m^2$  |

### 2.5 Bicarbonate Buffer

$$J_{Buffer} = k_1 [CO_2]_i - k_{-1} [H^+]_i [HCO_3^-]_i. \quad (23)$$

| Parameter | Description                        | Value | Units    |
|-----------|------------------------------------|-------|----------|
| $k_n$     | $HCO_3^-$ Buffer Dissociation rate | 0.132 | $s^{-1}$ |
| $k_p$     | $HCO_3^-$ Buffer Association rate  | 312   | $s^{-1}$ |

### 2.6 Tight Junctional Cation Fluxes

$$J_c^t = \frac{G_c^t}{Fz^c} (V_a - V_b - V_c^t), \quad (24)$$

where,

$$V_c^t = \frac{RT}{F} \ln \left( \frac{[c]_i}{[c]_e} \right).$$

Here  $c = Na^+$  or  $K^+$ .



| Parameter         | Description             | Value | Units |
|-------------------|-------------------------|-------|-------|
| $G_{\text{Na}}^t$ | Conductance             | 0.2   | nS    |
| $G_{\text{K}}^t$  | Conductance             | 0.16  | nS    |
| $z^{\text{Na}}$   | Na <sup>+</sup> valence | +1    | -     |
| $z^{\text{K}}$    | K <sup>+</sup> valence  | +1    | -     |

## 2.7 Water Fluxes

$$J_a^w = P_a \left( \sum [c]_l + \Psi_l - \sum [c]_i - \frac{x_i}{\omega_i} \right), \quad (25)$$

$$J_b^w = P_b \left( \sum [c]_i + \frac{x_i}{\omega_i} - \sum [c]_e \right), \quad (26)$$

$$J_t^w = P_t \left( \sum [c]_l + \Psi_l - \sum [c]_e \right). \quad (27)$$

Where,

$$\begin{aligned} \sum [c]_e &= [\text{K}^+]_e + [\text{Na}^+]_e + [\text{Cl}^-]_e + [\text{HCO}_3^-]_e + [\text{H}^+]_e + [\text{CO}_2]_e, \\ \sum [c]_i &= [\text{K}^+]_i + [\text{Na}^+]_i + [\text{Cl}^-]_i + [\text{HCO}_3^-]_i + [\text{H}^+]_i + [\text{CO}_2]_i, \\ \sum [c]_l &= [\text{K}^+]_l + [\text{Na}^+]_l + [\text{Cl}^-]_l + [\text{HCO}_3^-]_l + [\text{H}^+]_l. \end{aligned}$$

The parameter  $x_i$  denotes the amount of negatively charged ions with valence  $z = -1$  permeable to the cellular PM. It's value is solved by imposing electroneutrality in the cellular compartment. As such, each compartment of the model is assumed electroneutral at all times.

| Parameter | Description                         | Value | Units                                        |
|-----------|-------------------------------------|-------|----------------------------------------------|
| $P_a$     | Apical PM water permeability        | 4.43  | $\mu\text{m}^3 \text{mM}^{-1} \text{s}^{-1}$ |
| $P_b$     | Basolateral PM water permeability   | 1.94  | $\mu\text{m}^3 \text{mM}^{-1} \text{s}^{-1}$ |
| $P_t$     | Tight junction's water permeability | 0.05  | $\mu\text{m}^3 \text{mM}^{-1} \text{s}^{-1}$ |
| $\Psi_l$  | Luminal uncharged particles         | 51.74 | mM                                           |

## 2.8 IPR dynamics

$$J_{\text{IPR}} = k_{\text{IPR}} P_0, \quad (28)$$

where  $P_0$  is the open probability of the channel defined as

$$P_0 = \frac{\beta}{\beta + k_\beta(\beta + \alpha)}, \quad (29)$$

where

$$\alpha = A([\text{IP}_3]_i)(1 - m([\text{Ca}^{2+}]_i)h_\infty([\text{Ca}^{2+}]_i)), \quad (30)$$

$$\beta = B([\text{IP}_3]_i)m([\text{Ca}^{2+}]_i)h([\text{Ca}^{2+}]_i), \quad (31)$$

$$m(c) = \frac{[\text{Ca}^{2+}]_i^4}{K_c^4 + [\text{Ca}^{2+}]_i^4}, \quad (32)$$

$$1 - A([\text{IP}_3]_i) = B([\text{IP}_3]_i) = \frac{[\text{IP}_3]_i^2}{K_p^2 + [\text{IP}_3]_i^2}, \quad (33)$$

$$h_\infty([\text{Ca}^{2+}]_i) = \frac{K_h^4}{K_h^4 + [\text{Ca}^{2+}]_i^4}, \quad (34)$$

$$\tau_h([\text{Ca}^{2+}]_i) \frac{dh}{dt} = h_\infty([\text{Ca}^{2+}]_i) - h, \quad (35)$$

and

$$\tau_h([\text{Ca}^{2+}]_i) = \tau_{max} \frac{K_\tau^4}{K_\tau^4 + [\text{Ca}^{2+}]_i^4}. \quad (36)$$

| Parameter    | Description                                                                   | Value | Units                  |
|--------------|-------------------------------------------------------------------------------|-------|------------------------|
| $k_{IPR}$    | IPR rate                                                                      | 45    | $\mu\text{M.m.s}^{-1}$ |
| $k_\beta$    | -                                                                             | 0.4   | -                      |
| $K_c$        | Half maximal concentration of calcium for positive feedback on IPR            | 0.2   | $\mu\text{M}$          |
| $K_p$        | Half maximal concentration of $[\text{IP}_3]_i$ for feedback on the IPR       | 0.2   | $\mu\text{M}$          |
| $K_h$        | Half maximal concentration of calcium for negative feedback on IPR            | 0.08  | $\mu\text{M}$          |
| $K_\tau$     | Half maximal concentration of calcium for feedback on the time scaling factor | 0.1   | $\mu\text{M}$          |
| $\tau_{max}$ | Time scaling for negative feedback of calcium on the IPR                      | 100   | s                      |

## 2.9 SERCA pumps

$$J_{SERCA} = V_p \frac{[\text{Ca}^{2+}]_i^2 - \bar{K}[\text{Ca}^{2+}]_{ER}^2}{[\text{Ca}^{2+}]_i^2 + k_p^2} \quad (37)$$

| Parameter | Description     | Value      | Units                |
|-----------|-----------------|------------|----------------------|
| $V_p$     | SERCA pump Rate | 0.9        | $\mu\text{M.s}^{-1}$ |
| $\bar{K}$ | -               | 0.00001957 | -                    |
| $k_p$     | -               | 0.2        | $\mu\text{M}$        |

## 2.10 $\text{IP}_3$ dynamics

$$V_{PLC} = \mu(x) \frac{[\text{Ca}^{2+}]_i^2}{[\text{Ca}^{2+}]_i^2 + K_{PLC}^2}, \quad (38)$$

$$V_{deg} = \left( V_{5K} + V_{3K} \frac{[\text{Ca}^{2+}]_i^2}{[\text{Ca}^{2+}]_i^2 + K_{3K}^2} \right) [\text{IP}_3]_i, \quad (39)$$

$$\mu(x) = \begin{cases} k_{PLC} & \text{if } d_b(x) < d_{PLC} \text{ and } d_a(x) > dl_{PLC}, \\ 0 & \text{else,} \end{cases} \quad (40)$$

| Parameter  | Description                                                                  | Value | Units                           |
|------------|------------------------------------------------------------------------------|-------|---------------------------------|
| $K_{PLC}$  | Half maximal concentration of $[IP_3]_i$ for feedback on PLC                 | 0.07  | $\mu\text{M}$                   |
| $K_{3K}$   | Half maximal concentration of $[IP_3]_i$ for feedback on $[IP_3]_i$ 3-Kinase | 0.4   | $\mu\text{M}$                   |
| $V_{3K}$   | $[IP_3]_i$ degradation rate by $[IP_3]_i$ 3-Kinase                           | 0.05  | $\text{s}^{-1}$                 |
| $V_{5K}$   | $[IP_3]_i$ degradation rate by $[IP_3]_i$ 5-Kinase                           | 0.05  | $\text{s}^{-1}$                 |
| $d_{PLC}$  | Critical distance from the basal membrane for the expression of PLC          | 0.8   | $\mu\text{m}$                   |
| $dl_{PLC}$ | Minimum distance from the apical membrane for the expression of PLC          | 0.6   | $\mu\text{m}$                   |
| $k_{PLC}$  | Maximum PLC rate                                                             | 0.6   | $\mu\text{M}\cdot\text{s}^{-1}$ |
| $d_b(x)$   | Distance to the basal region of the point $x$                                | -     | $\mu\text{m}$                   |
| $d_a(x)$   | Distance to the basal region of the point $x$                                | -     | $\mu\text{m}$                   |

## 2.11 Wave propagation model

$$\begin{cases} J_{\text{Wav}} = V_{\text{Wav}}(x) \frac{[Ca^{2+}]_i^4}{[Ca^{2+}]_i^4 + K_{\text{Wav}1}^4} g \\ \frac{dg}{dt} = (g_\infty - g) / \tau_{\text{Wav}}, \end{cases} \quad (41)$$

where

$$g_\infty = \frac{K_{\text{hWav}}^2}{K_{\text{hWav}}^2 + [Ca^{2+}]_i^2}. \quad (42)$$

and

$$V_{\text{Wav}}(x) = \begin{cases} V_{\text{Wav}}^{\max} \frac{d_a(x)}{d_{\text{Wav}}} & \text{if } d_a(x) < d_{\text{Wav}}, \\ V_{\text{Wav}}^{\max} & \text{else.} \end{cases} \quad (43)$$

| Parameter               | Description                                                                     | Value | Units                           |
|-------------------------|---------------------------------------------------------------------------------|-------|---------------------------------|
| $V_{\text{Wav}}^{\max}$ | Wave propagation model rate                                                     | 0.15  | $\mu\text{M}\cdot\text{s}^{-1}$ |
| $K_{\text{wav}1}$       | Half maximal concentration of calcium for positive feedback on wave propagation | 0.2   | $\mu\text{M}$                   |
| $d_{\text{Wav}}$        | Critical distance for the expression of the wave propagation                    | 1     | $\mu\text{m}$                   |
| $K_{\text{hWav}}$       | Half maximal concentration of calcium for negative feedback on wave propagation | 0.15  | $\mu\text{M}$                   |
| $\tau_{\text{wav}}$     | Time scaling for negative feedback of calcium on the wave propagation           | 1     | s                               |

# Cell 1

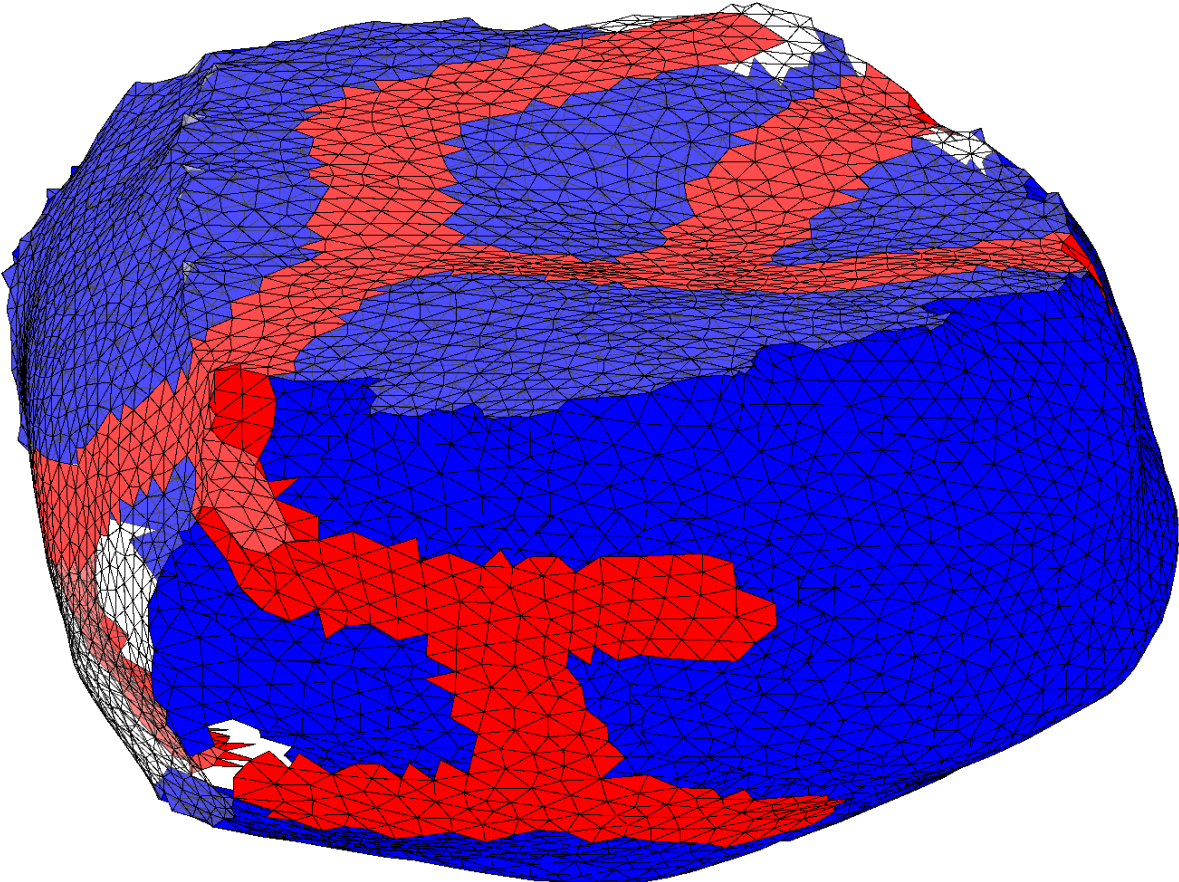

1  $\mu\text{m}$

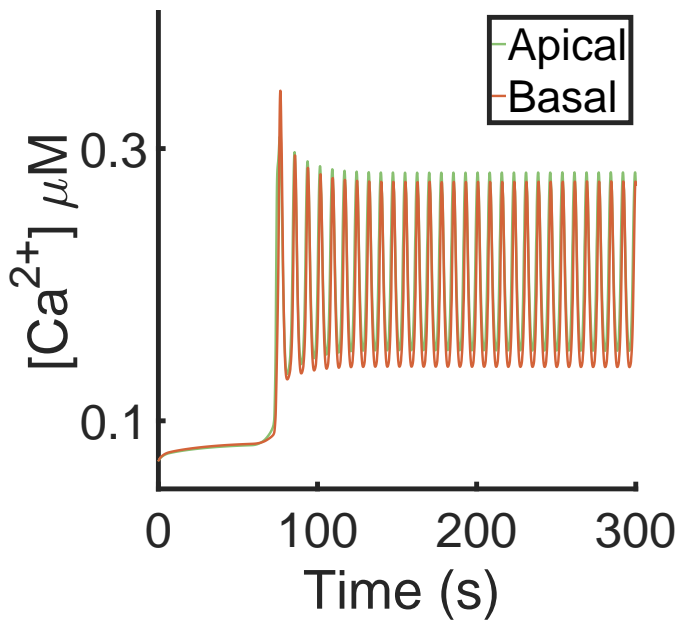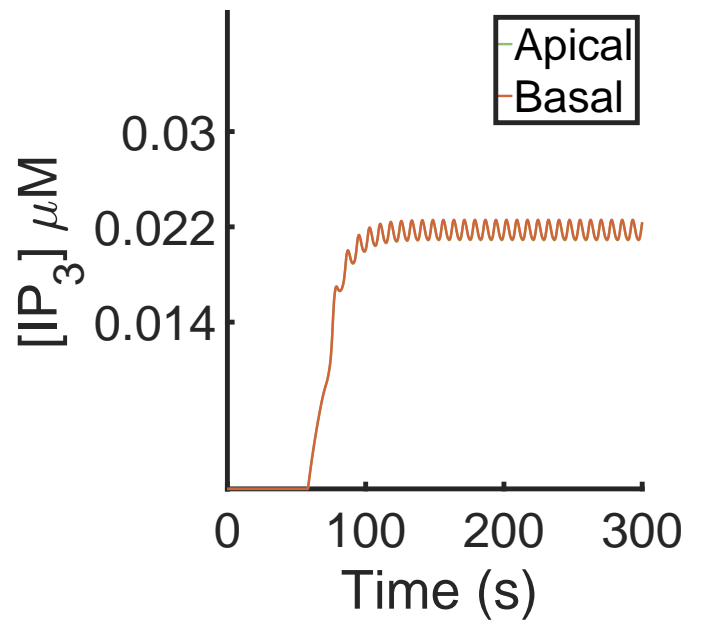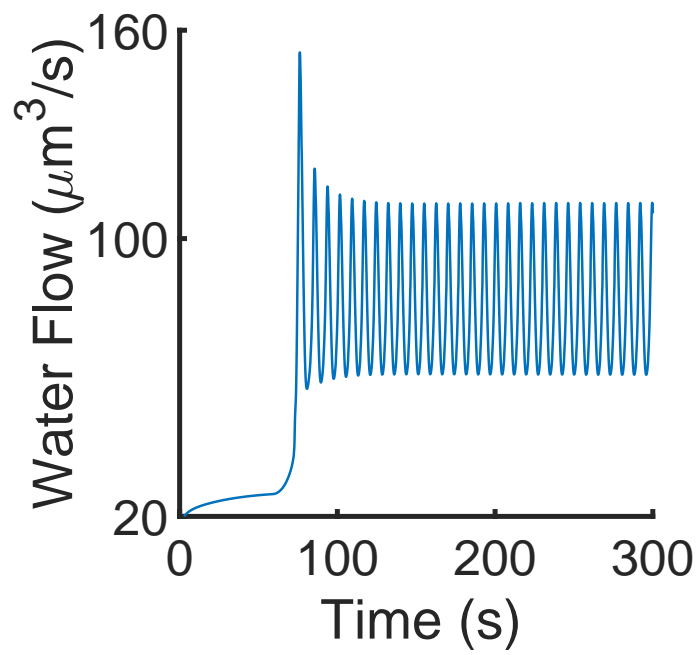

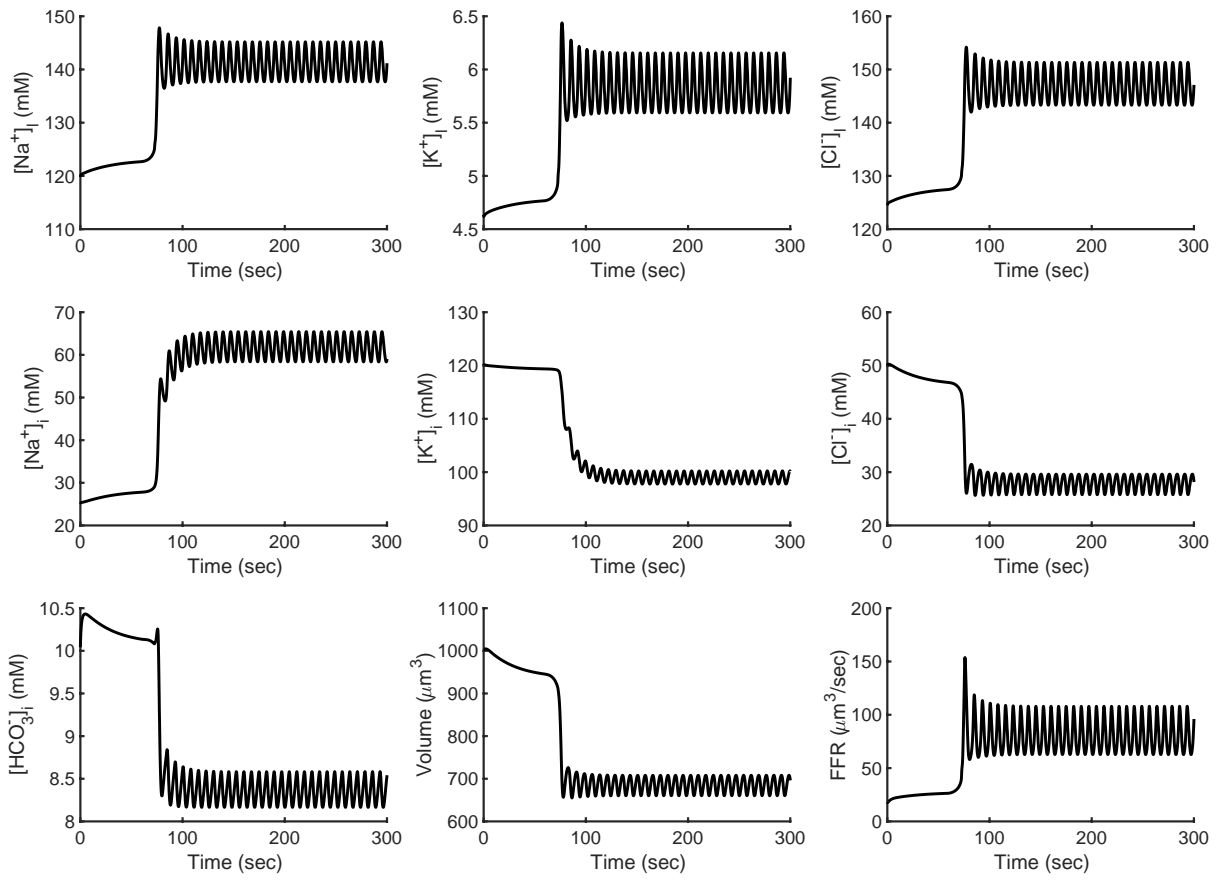

# Cell 2

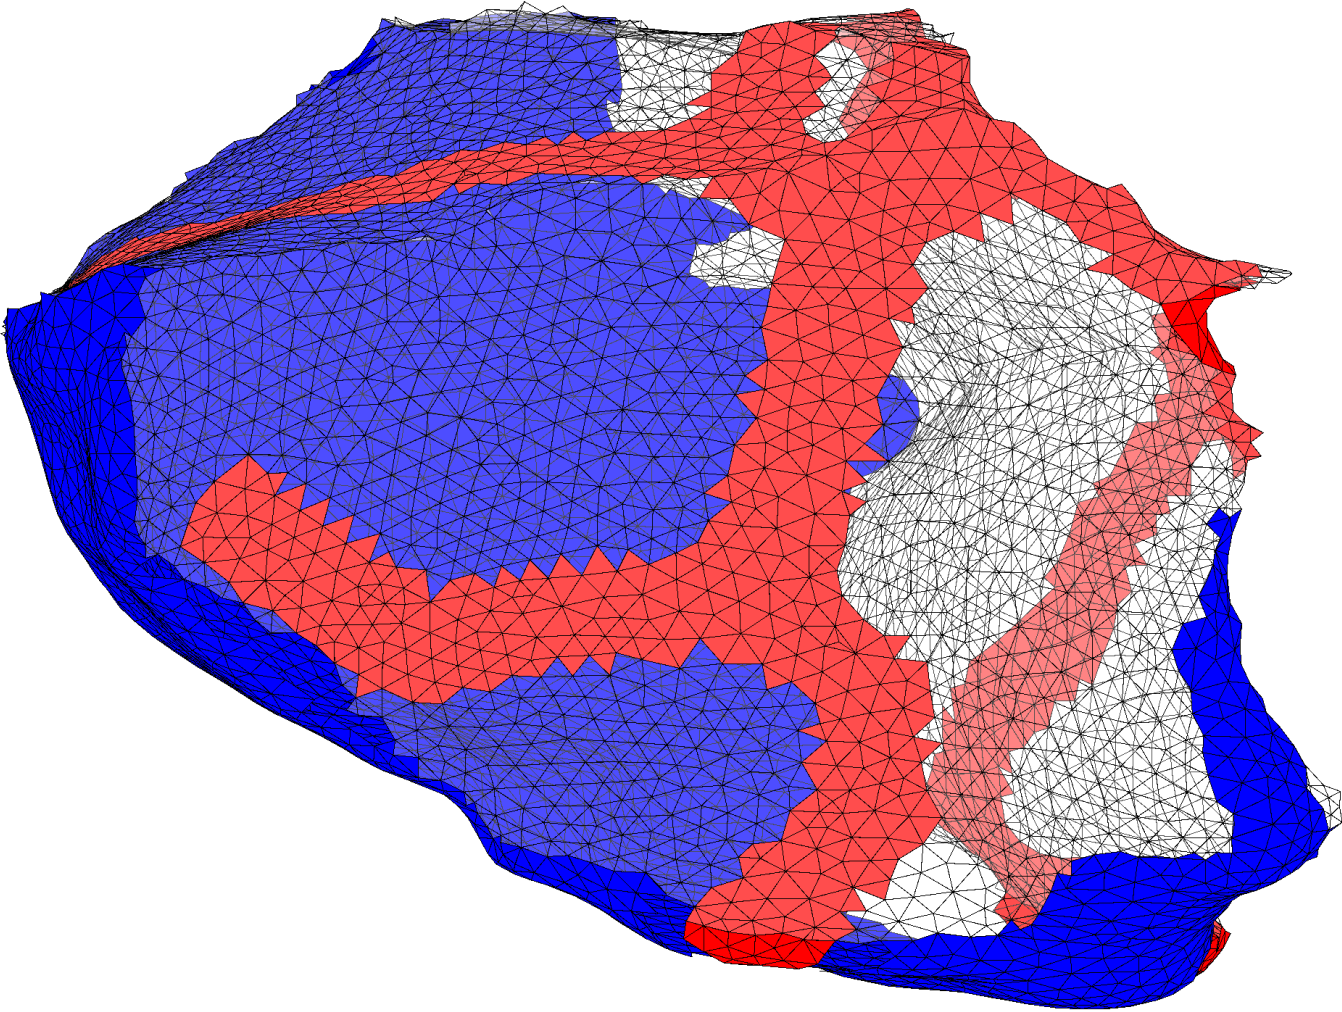

1  $\mu\text{m}$

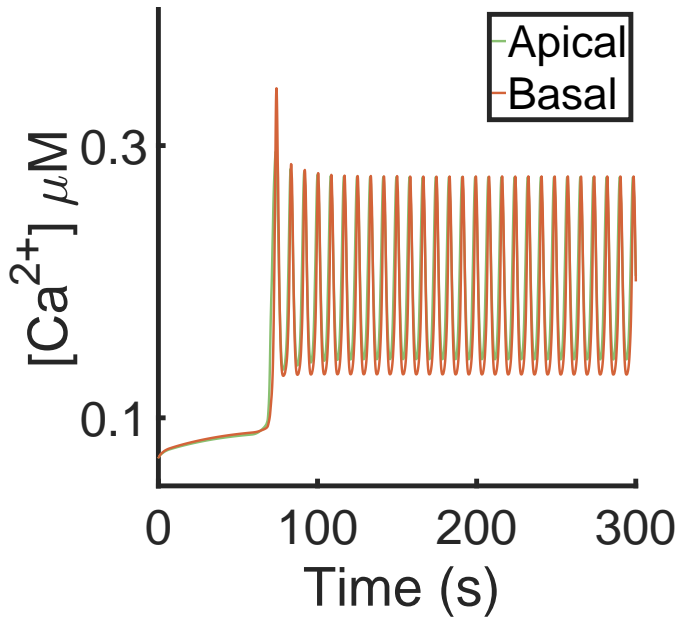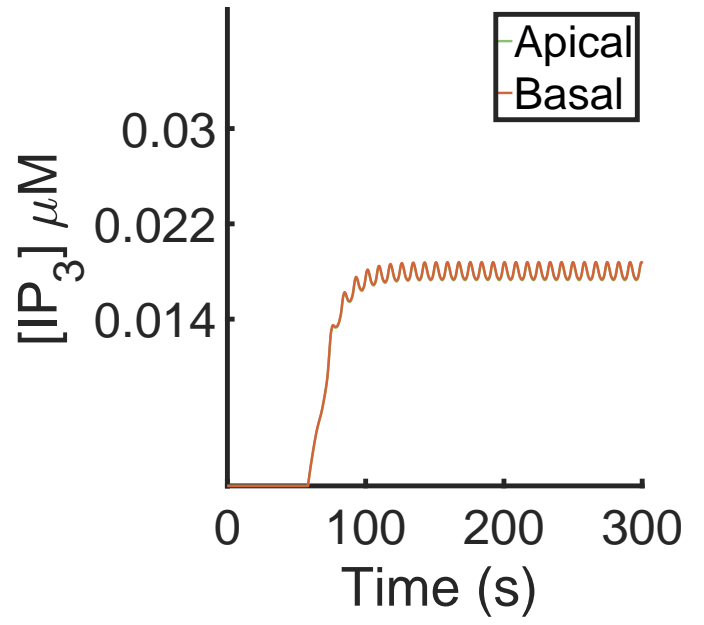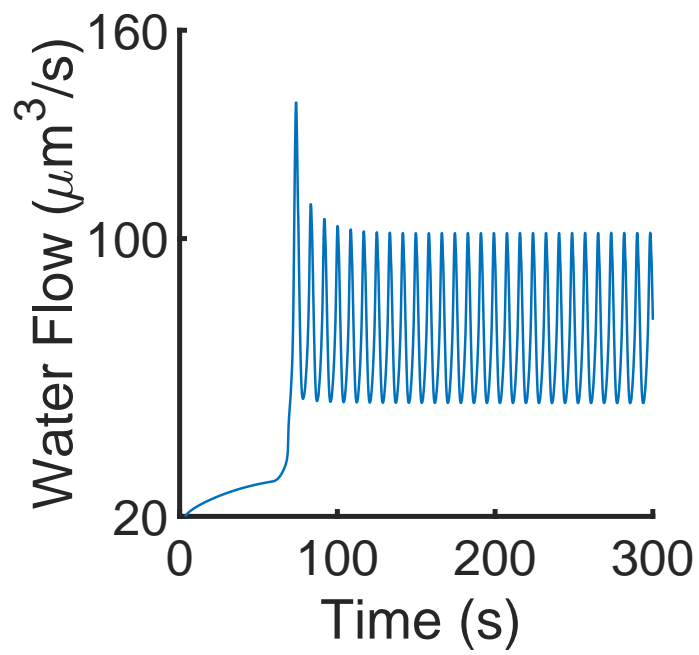



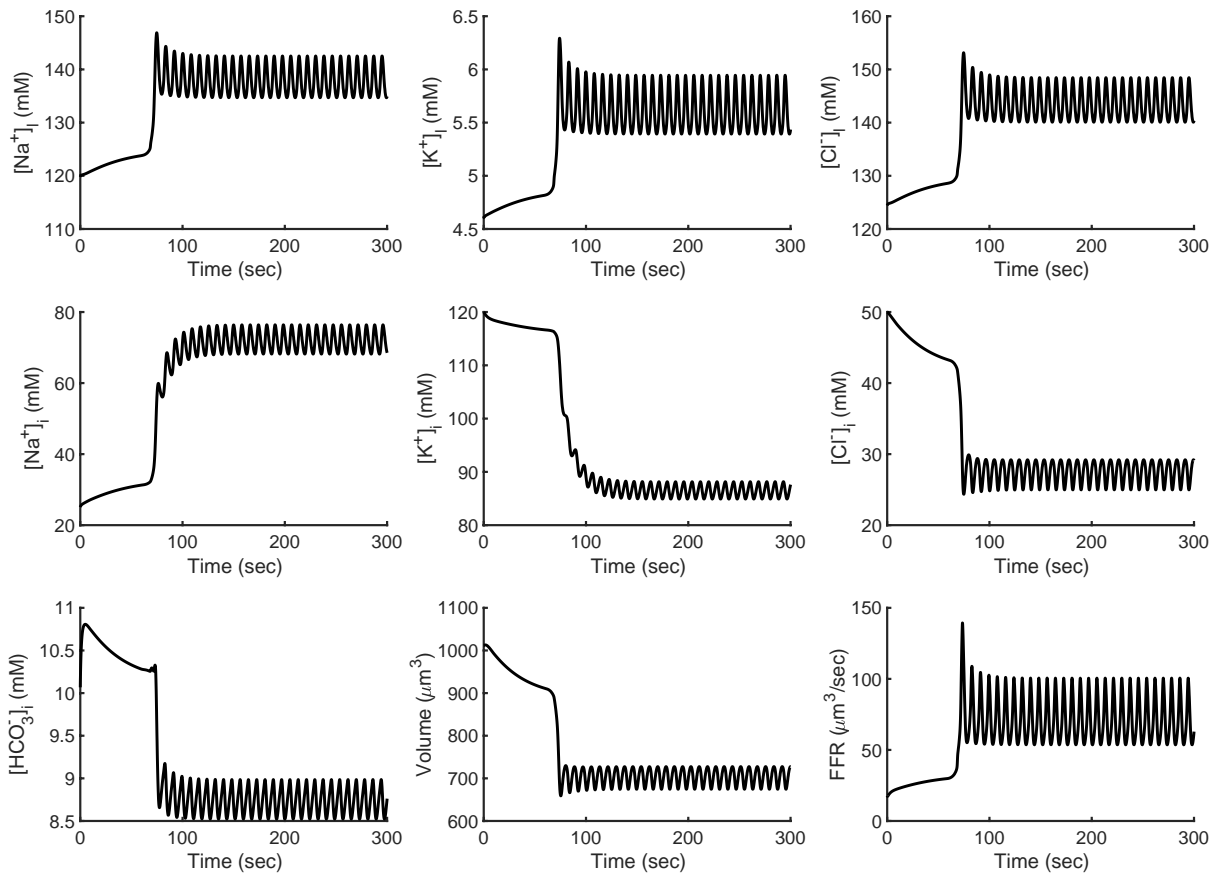

# Cell 3

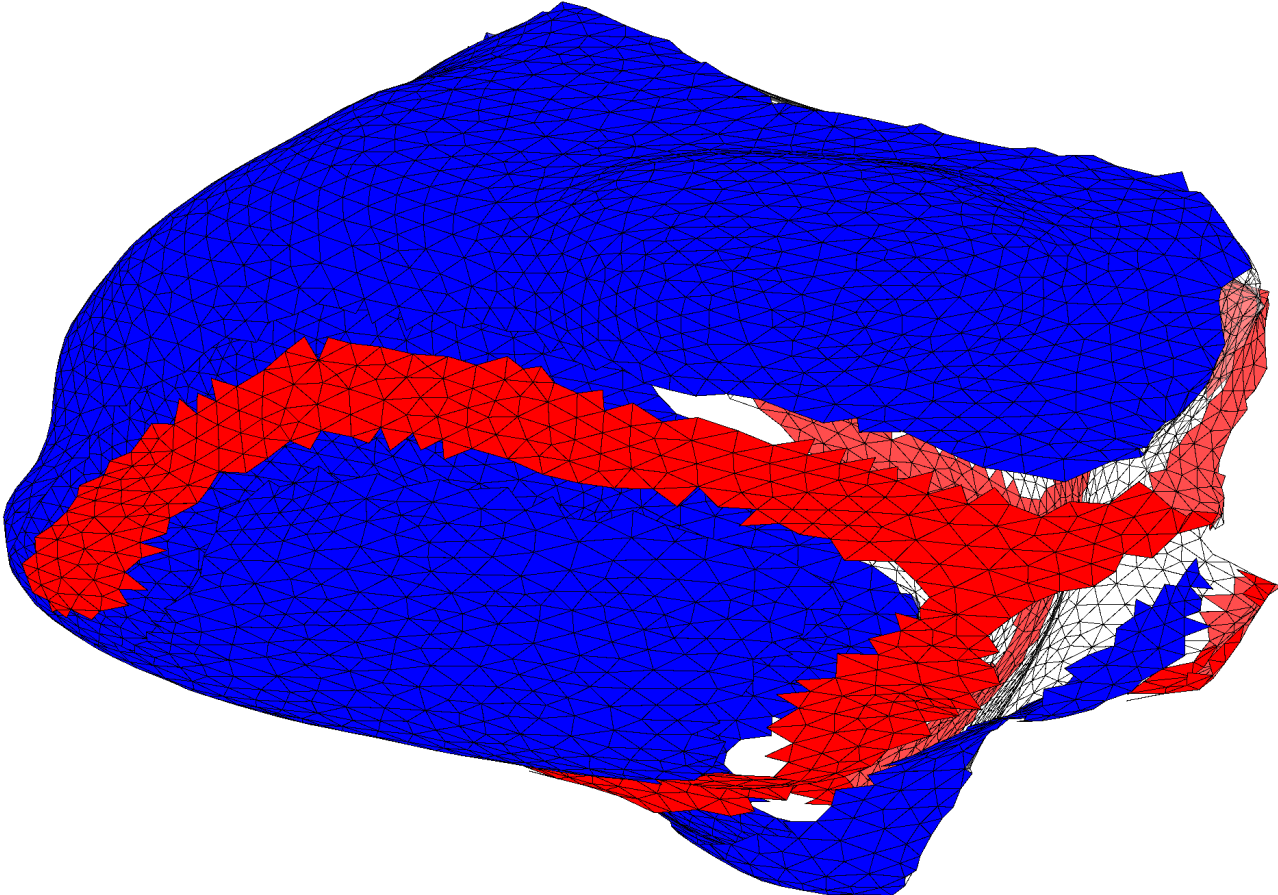

1  $\mu\text{m}$

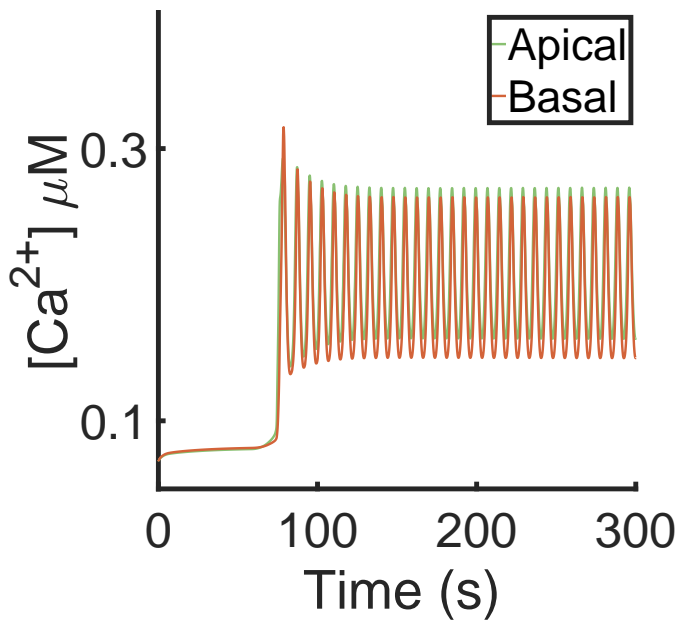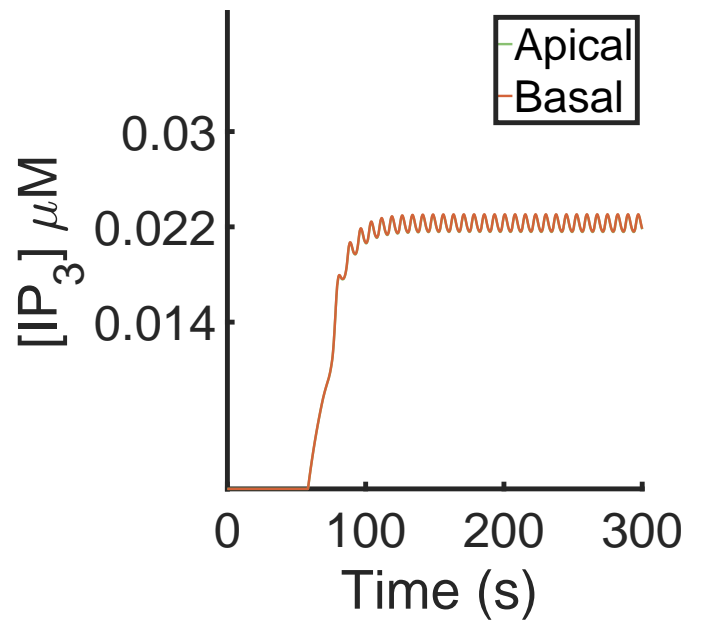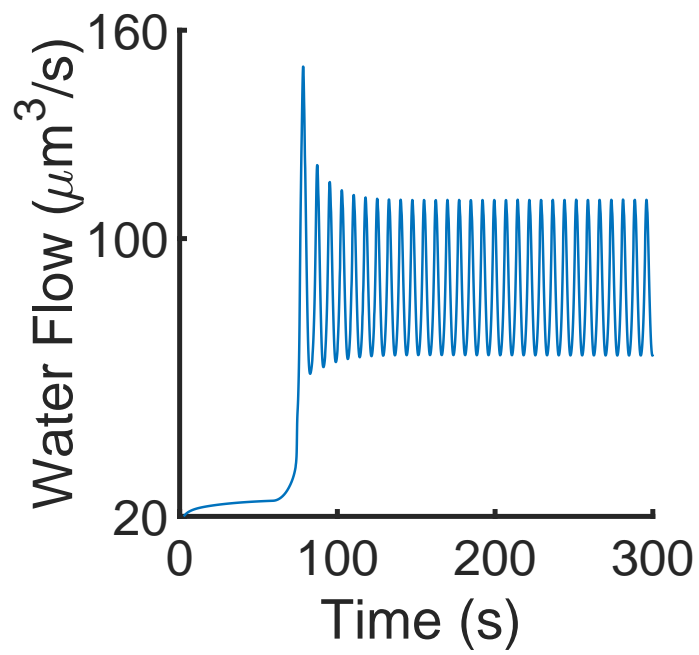

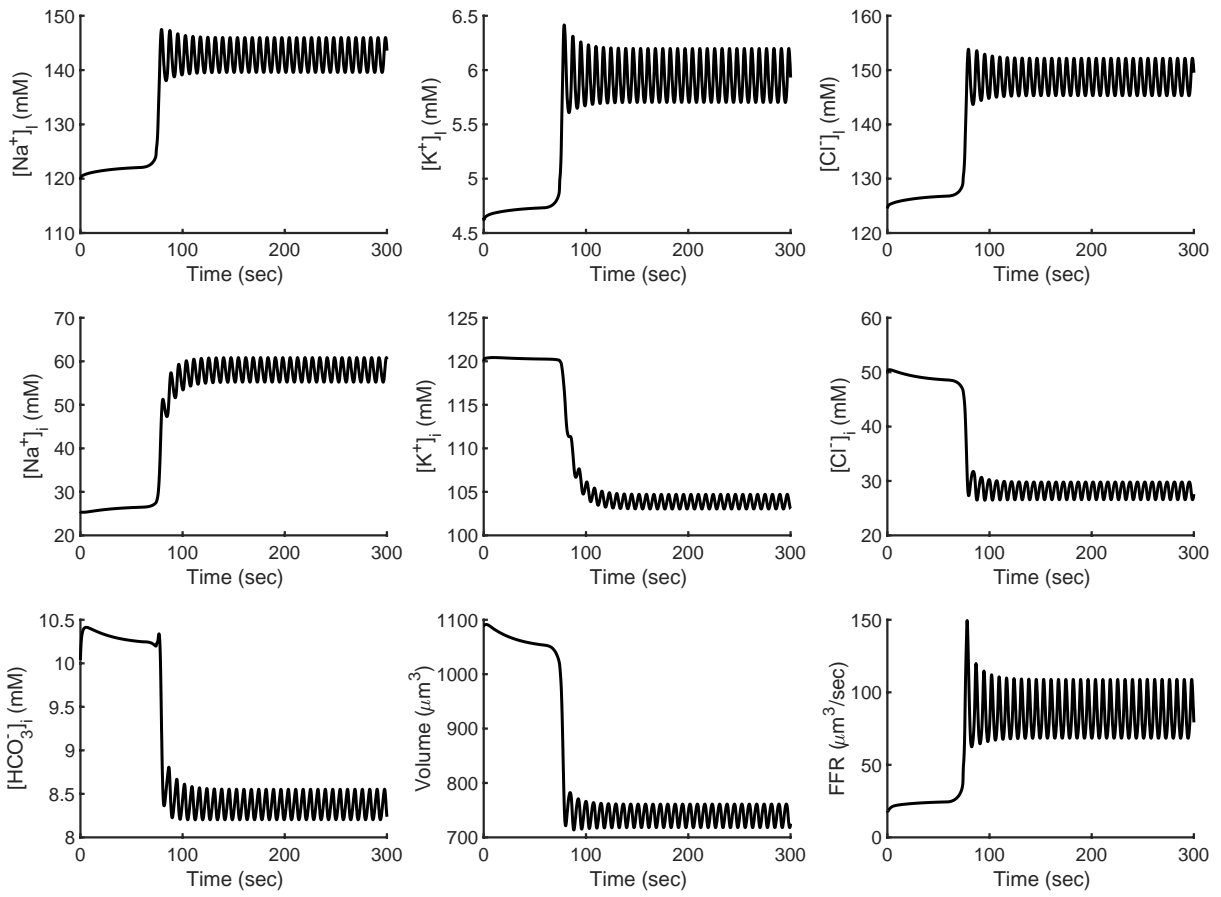

# Cell 5

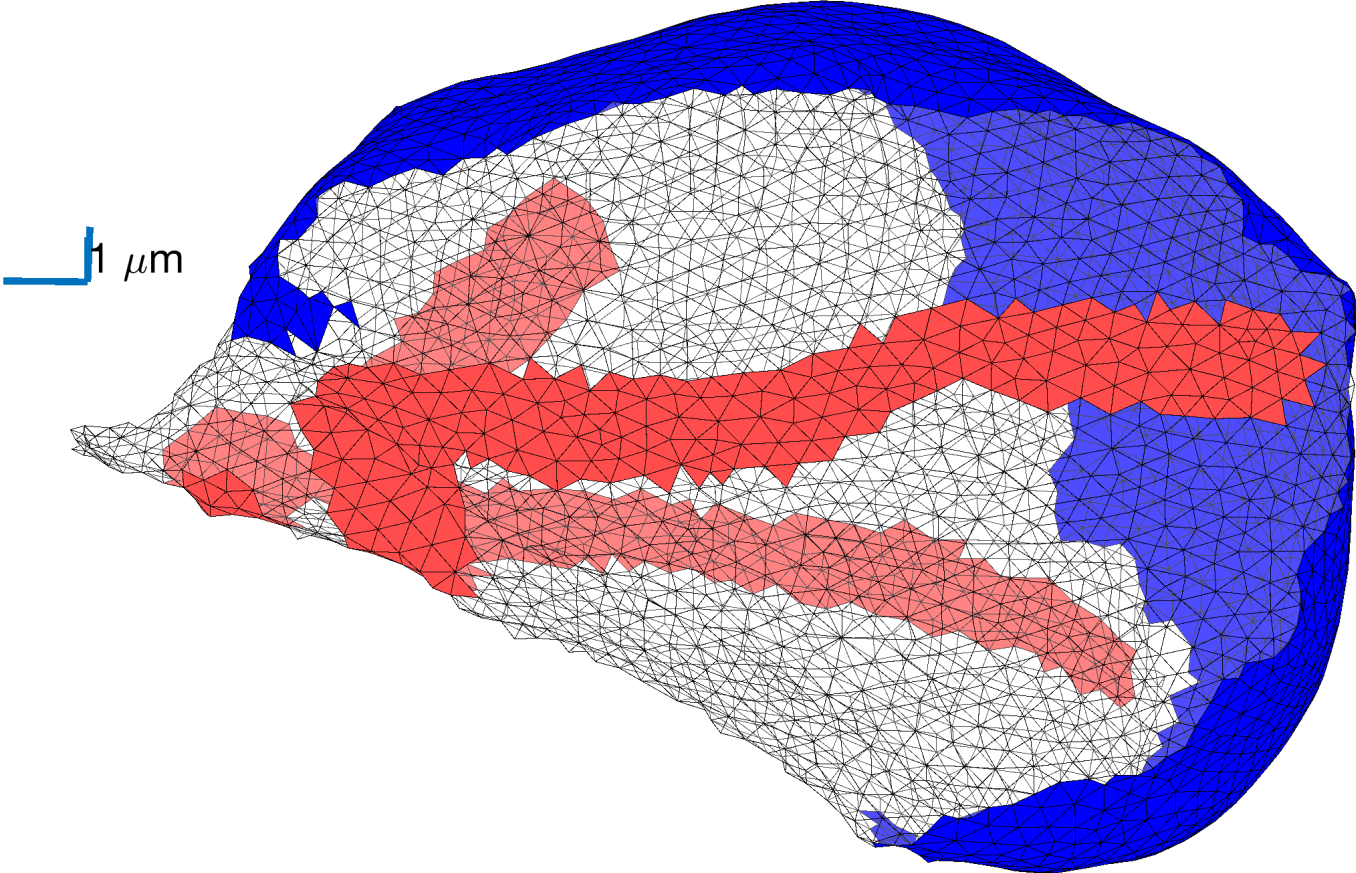

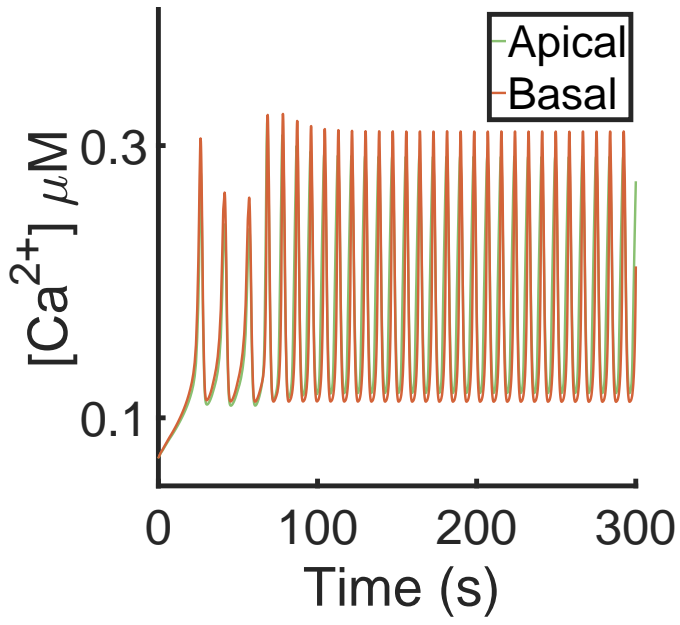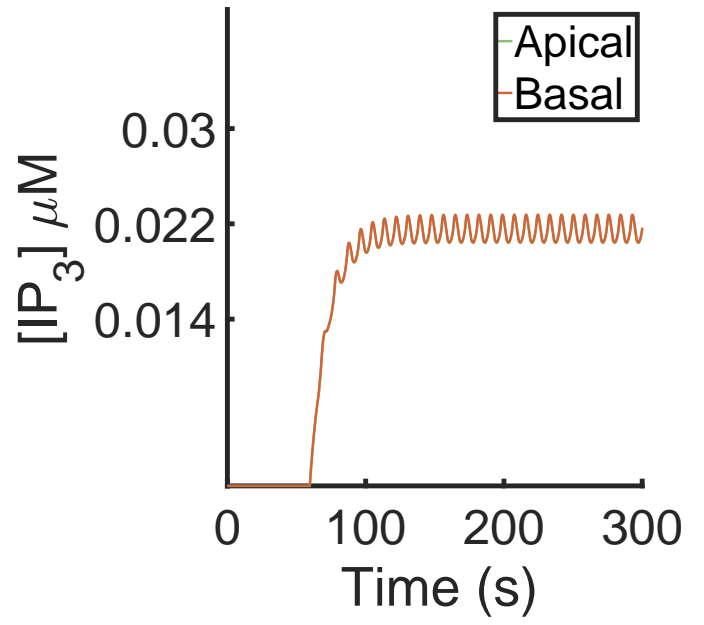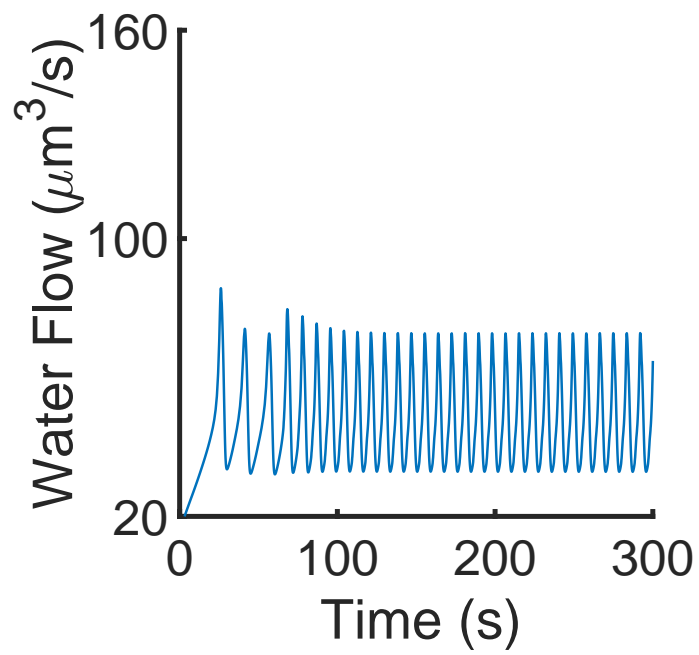

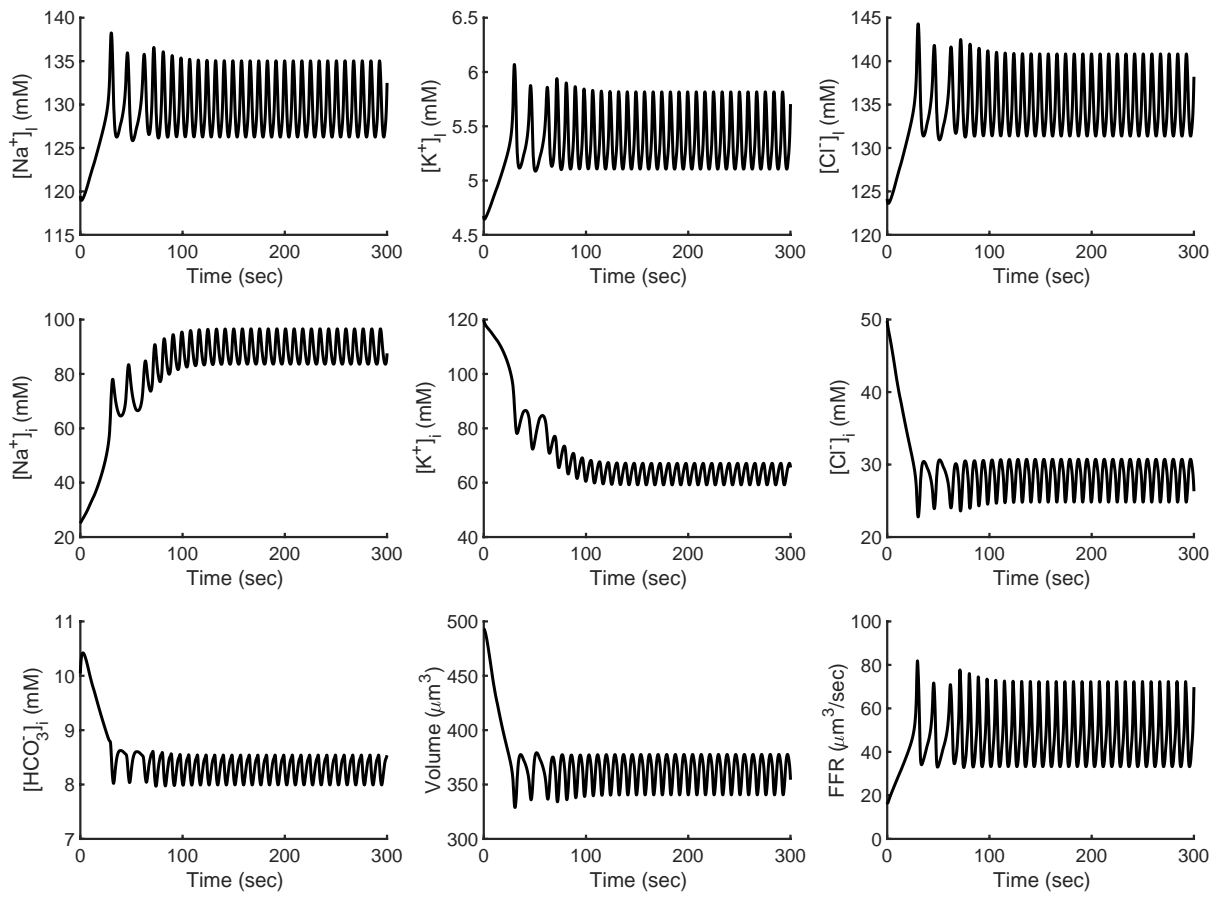

# Cell 6

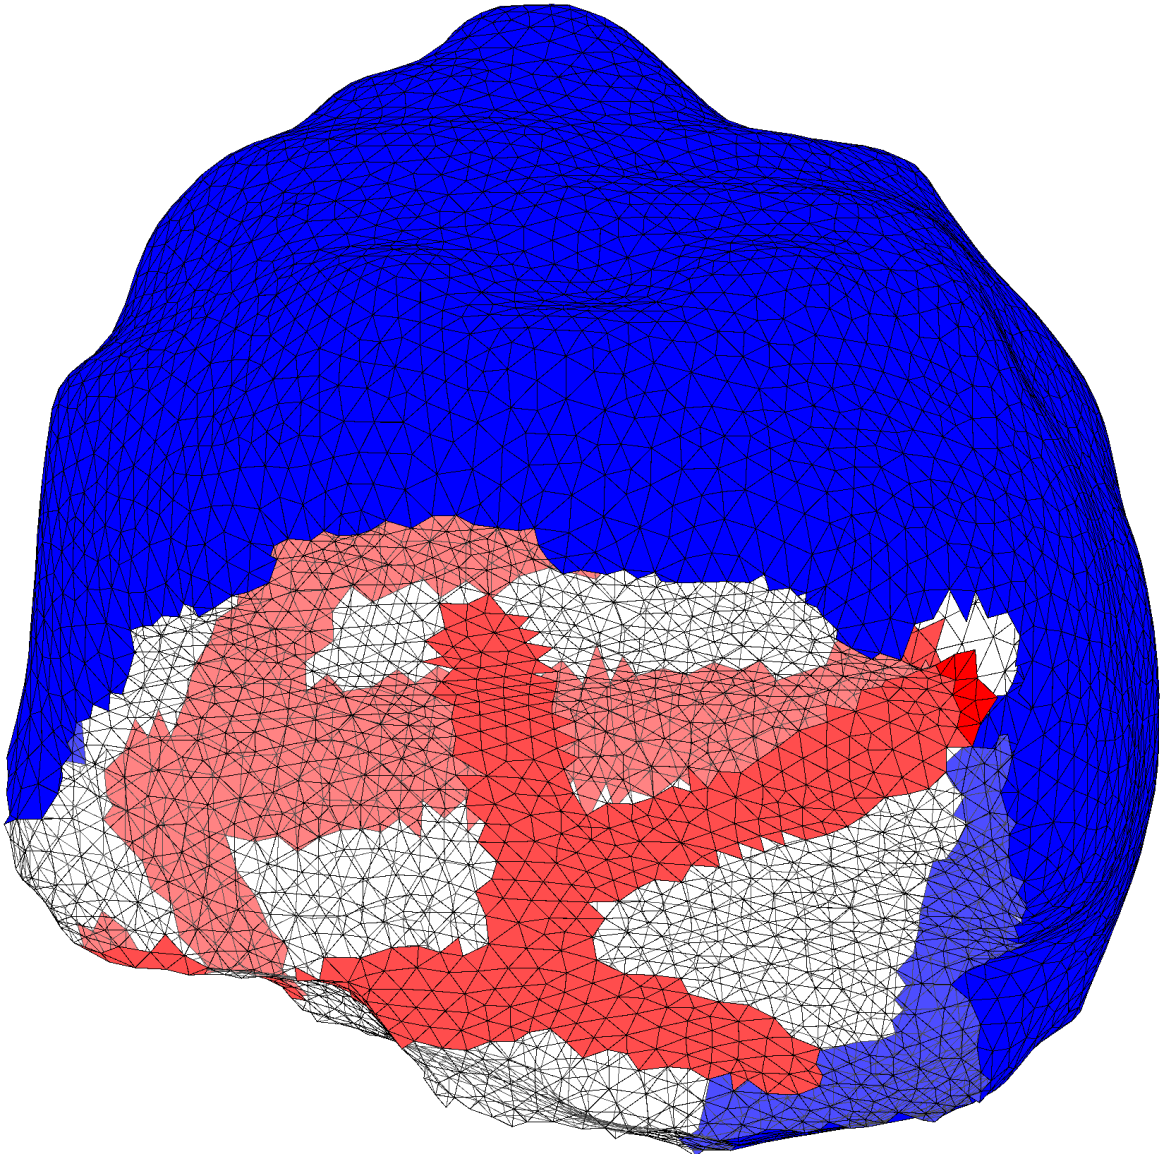



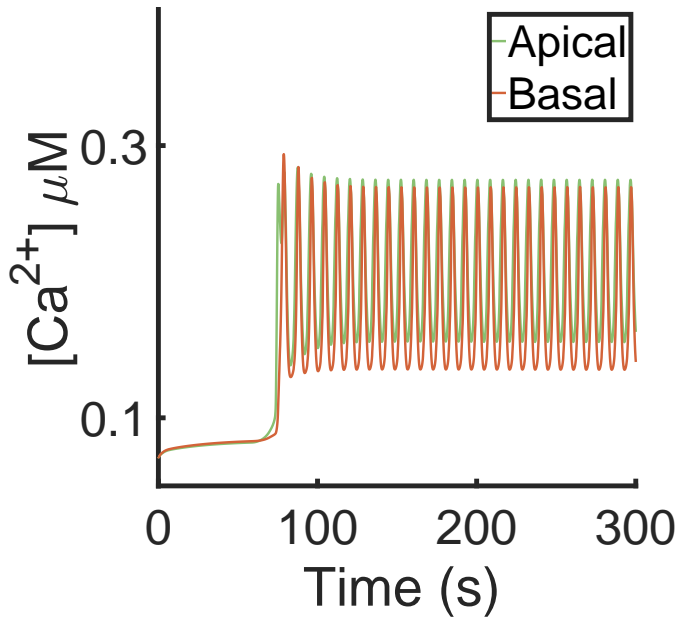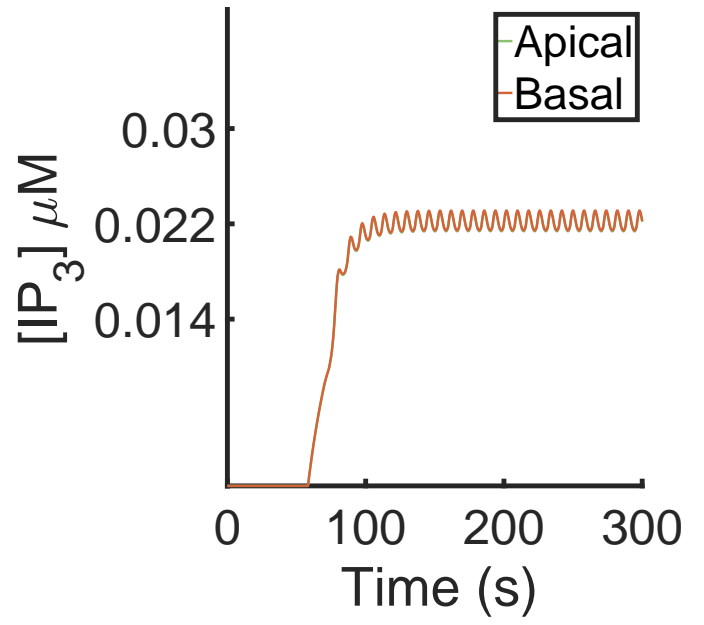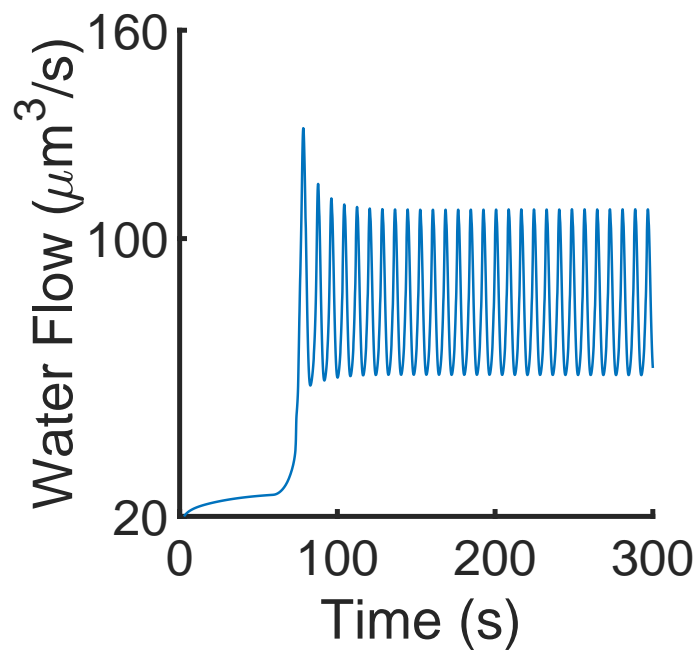

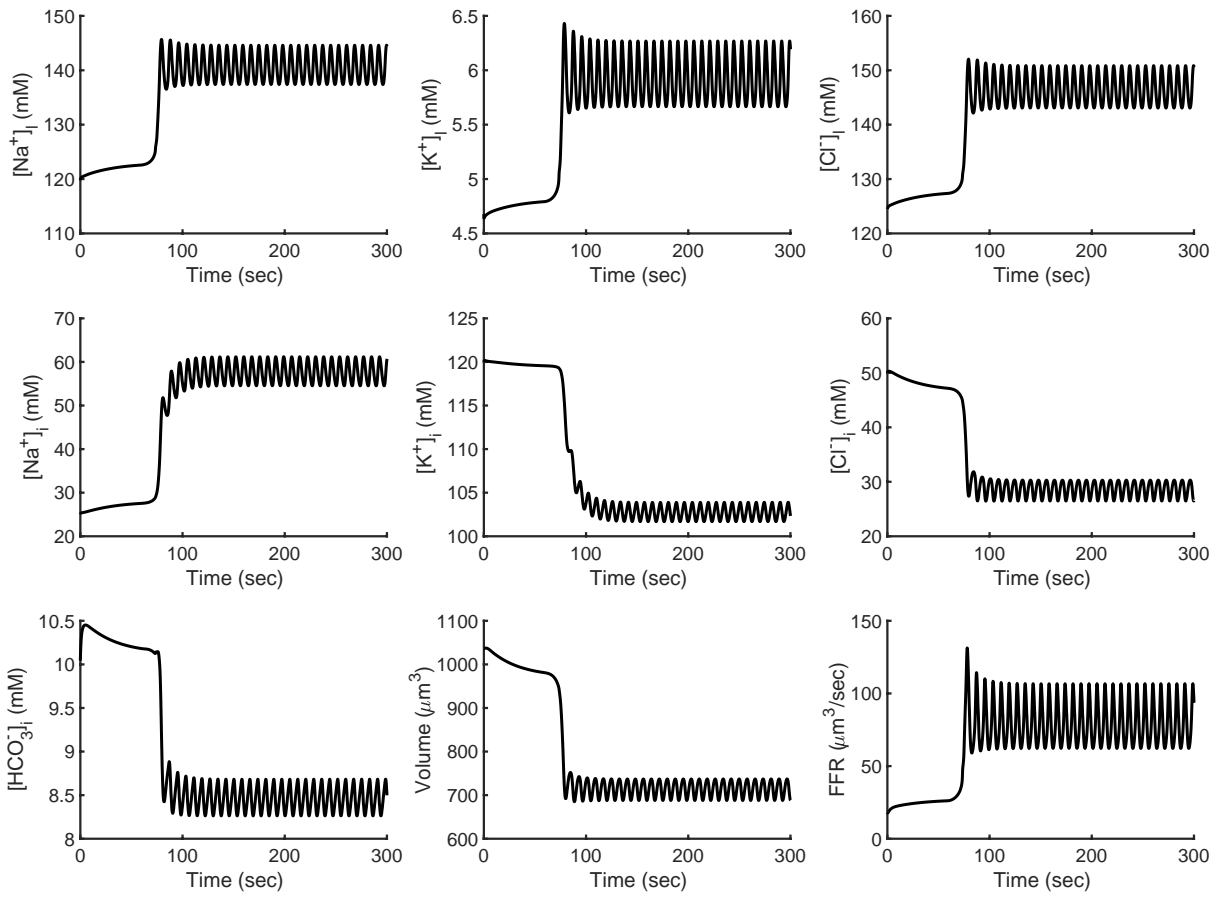

# Parotid Acini Cluster

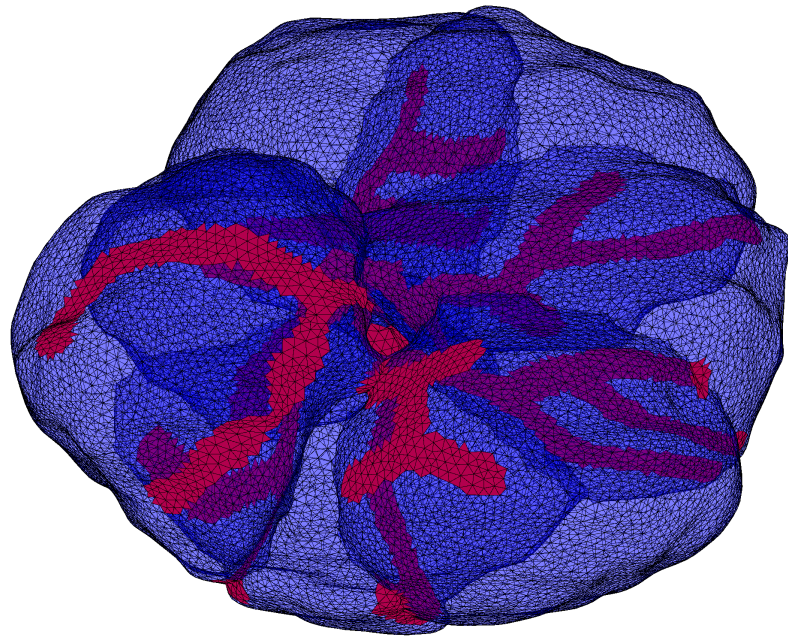

# Calcium oscillations comparison

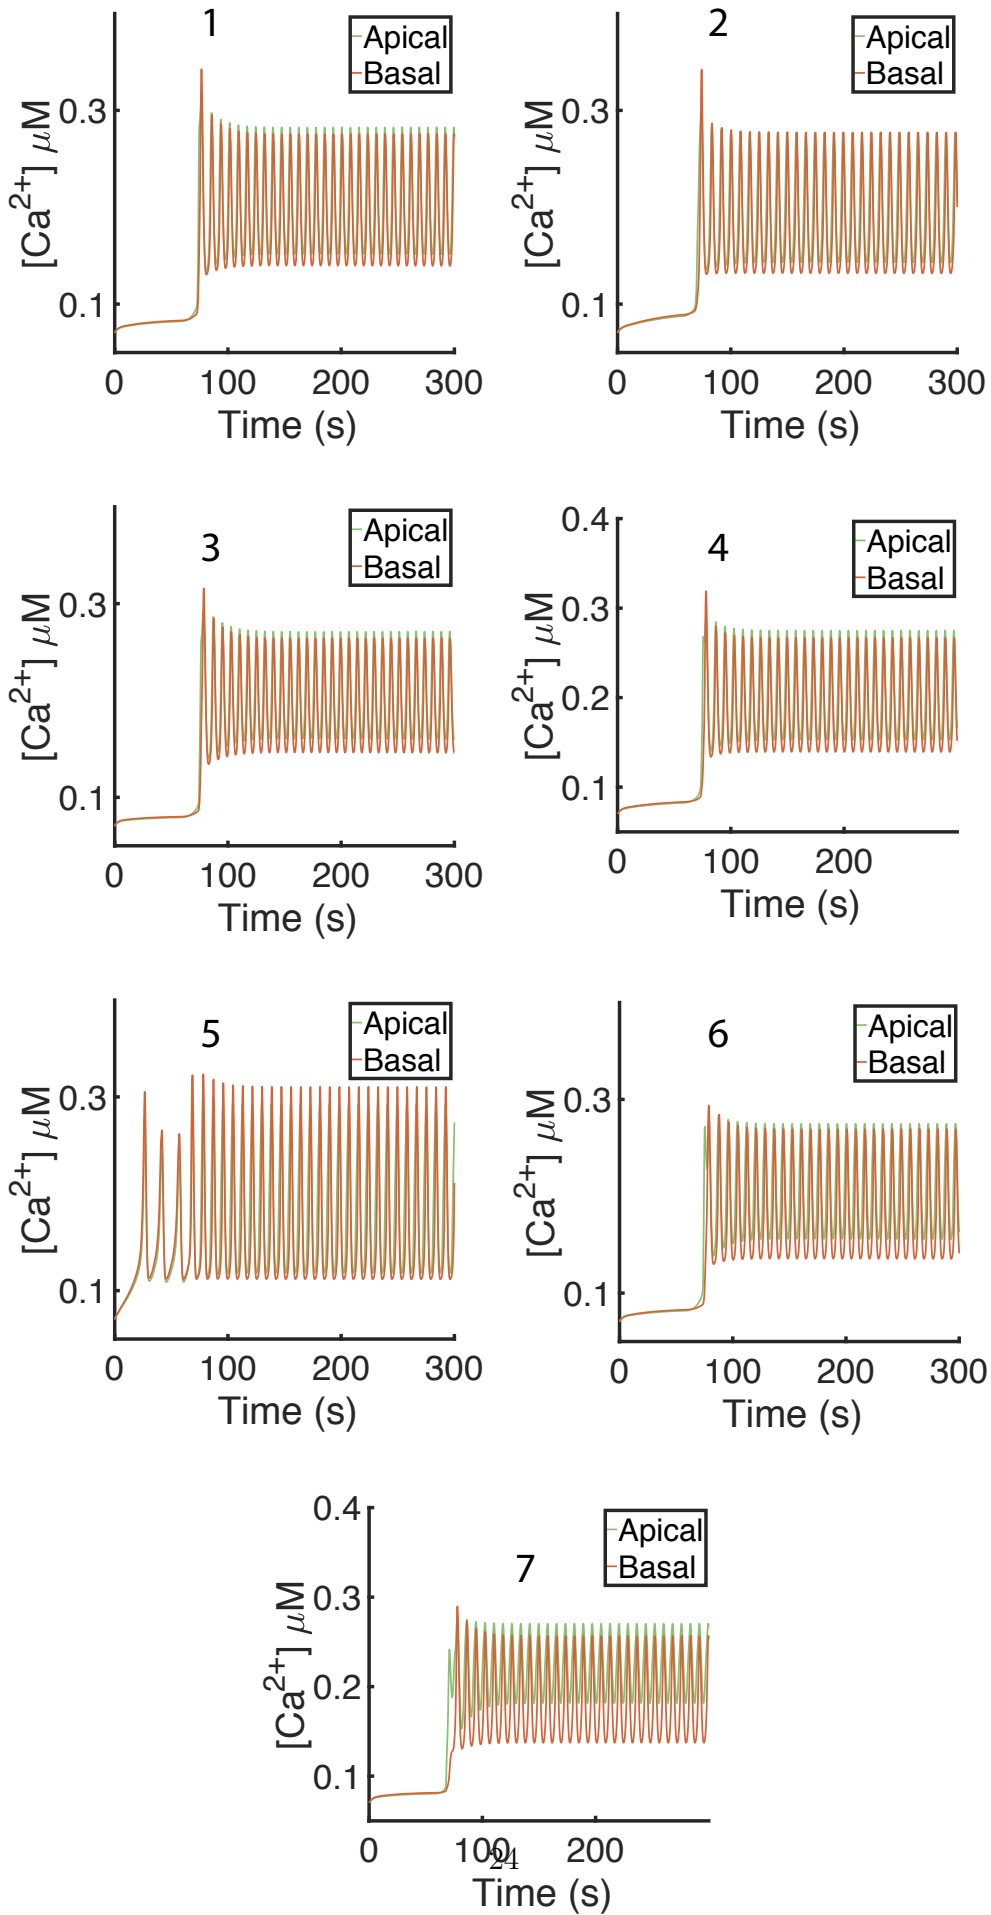

# Parameters of the Fluid Secretion Model

| Parameter                                     | Description                                                         | Value                                 | Units                               |
|-----------------------------------------------|---------------------------------------------------------------------|---------------------------------------|-------------------------------------|
| $D_c$                                         | Calcium diffusion coefficient                                       | 5                                     | $\mu\text{m}^2.\text{s}^{-1}$       |
| $D_p$                                         | IP <sub>3</sub> diffusion coefficient                               | 285                                   | $\mu\text{m}^2.\text{s}^{-1}$       |
| $\gamma$                                      | ratio of ER volume over cytosolic volume                            | 0.185                                 | -                                   |
| $K_{CaKC}$                                    | Half half maximal concentration for basal K <sup>+</sup> channels   | 0.3                                   | $\mu\text{M}$                       |
| $\eta_2$                                      | Hill coefficient for basal K <sup>+</sup> channels                  | 4.7                                   | -                                   |
| $G_K$                                         | Cl <sup>-</sup> channel whole cell conductance                      | 14.6                                  | nS                                  |
| $K_{CaCC}$                                    | Half half maximal concentration for apical Cl <sup>-</sup> channels | 0.2                                   | $\mu\text{M}$                       |
| $\eta_1$                                      | Hill coefficient for apical Cl <sup>-</sup> channels                | 4.49                                  | -                                   |
| $G_{Cl}$                                      | Cl <sup>-</sup> channel whole cell conductance                      | 18.2                                  | nS                                  |
| $\omega_l/\omega_i$                           | Lumen to cell volume ratio                                          | 0.02                                  | -                                   |
| R                                             | Universal gas constant                                              | 8.3144621                             | J mol <sup>-1</sup> K <sup>-1</sup> |
| T                                             | Temperature                                                         | 310                                   | K                                   |
| F                                             | Faraday's constant                                                  | 96485.3365                            | C mol <sup>-1</sup>                 |
| $C_m$                                         | PM capacitance                                                      | 1                                     | F                                   |
| pH <sub>e</sub>                               | Interstitial pH                                                     | 7.41                                  | -                                   |
| pH <sub>i</sub>                               | Cellular pH                                                         | 6.91                                  | -                                   |
| pH <sub>l</sub>                               | Luminal pH                                                          | 6.81                                  | -                                   |
| [Na <sup>+</sup> ] <sub>e</sub>               | Interstitial Na <sup>+</sup>                                        | 140.2                                 | mM                                  |
| [K <sup>+</sup> ] <sub>e</sub>                | Interstitial K <sup>+</sup>                                         | 5.3                                   | mM                                  |
| [Cl <sup>-</sup> ] <sub>e</sub>               | Interstitial Cl <sup>-</sup>                                        | 102.6                                 | mM                                  |
| [CO <sub>2</sub> ] <sub>e</sub>               | Interstitial CO <sub>2</sub>                                        | 1.6                                   | mM                                  |
| [HCO <sub>3</sub> <sup>-</sup> ] <sub>e</sub> | Interstitial HCO <sub>3</sub> <sup>-</sup>                          | 40                                    | mM                                  |
| [H <sup>+</sup> ] <sub>e</sub>                | Interstitial H <sup>+</sup>                                         | $1\text{e}3 \times 10^{-\text{pH}_e}$ | mM                                  |
| [Na <sup>+</sup> ] <sub>i</sub>               | Intracellular Na <sup>+</sup> at rest                               | 25.94                                 | mM                                  |
| [K <sup>+</sup> ] <sub>i</sub>                | Intracellular K <sup>+</sup> at rest                                | 116.83                                | mM                                  |
| [Cl <sup>-</sup> ] <sub>i</sub>               | Intracellular Cl <sup>-</sup> at rest                               | 49.78                                 | mM                                  |
| [Ca <sup>2+</sup> ] <sub>i</sub>              | Intracellular Ca <sup>2+</sup> at rest                              | 0.05                                  | $\mu\text{M}$                       |
| [HCO <sub>3</sub> <sup>-</sup> ] <sub>i</sub> | Intracellular HCO <sub>3</sub> <sup>-</sup> at rest                 | 10                                    | mM                                  |
| [H <sup>+</sup> ] <sub>i</sub>                | Intracellular H <sup>+</sup> at rest                                | $1\text{e}3 \times 10^{-\text{pH}_i}$ | mM                                  |
| [CO <sub>2</sub> ] <sub>i</sub>               | Intracellular CO <sub>2</sub>                                       | 6.6                                   | mM                                  |
| [Na <sup>+</sup> ] <sub>l</sub>               | Luminal Na <sup>+</sup> at rest                                     | 123.4                                 | mM                                  |
| [K <sup>+</sup> ] <sub>l</sub>                | Luminal K <sup>+</sup> at rest                                      | 5.29                                  | mM                                  |
| [Cl <sup>-</sup> ] <sub>l</sub>               | Luminal Cl <sup>-</sup> at rest                                     | 128.75                                | mM                                  |
| [HCO <sub>3</sub> <sup>-</sup> ] <sub>l</sub> | Luminal HCO <sub>3</sub> <sup>-</sup> at rest                       | 0.00015                               | mM                                  |
| [H <sup>+</sup> ] <sub>l</sub>                | Luminal H <sup>+</sup> at rest                                      | $1\text{e}3 \times 10^{-\text{pH}_l}$ | mM                                  |
| $V_a$                                         | Apical PM potential                                                 | 58.9                                  | mV                                  |
| $V_b$                                         | Basal PM potential                                                  | 62.8                                  | mV                                  |

### 3 Parameters of the homogeneous model

Table 1: Parameters of the homogeneous model

| Parameter       | Description                                              | Value | Units          |
|-----------------|----------------------------------------------------------|-------|----------------|
| $k_{IPR}$       | IPR rate                                                 | 45    | $s^{-1}$       |
| $V_p$           | SERCA pump rate                                          | 0.9   | -              |
| $\tau_{max}$    | Time scaling for negative feedback of calcium on the IPR | 100   | s              |
| $V_{Wav}^{max}$ | Wave propagation model rate                              | 0.07  | $\mu M.s^{-1}$ |

## 4 Parameters of the open-cell model

Table 2: Parameters of the open-cell model

| Parameter       | Description                                                     | Value  | Units                           |
|-----------------|-----------------------------------------------------------------|--------|---------------------------------|
| $\alpha_0$      | Constant leak of $\text{Ca}^{2+}$ from the exterior of the cell | 0.0027 | $\mu\text{M}\cdot\text{s}^{-1}$ |
| $\alpha_1$      | Maximum rate of the SOCC                                        | 0.07   | $\mu\text{M}\cdot\text{s}^{-1}$ |
| $\alpha_2$      | Agonist-dependent influx                                        | 15     | $\text{s}^{-1}$                 |
| $\delta$        | Permeability of the cell                                        | 1      | -                               |
| $V_{\text{PM}}$ | Maximum $\text{Ca}^{2+}$ flux through the PMCA                  | 0.11   | $\mu\text{M}\cdot\text{s}^{-1}$ |
| $K_{\text{PM}}$ | Half-activation of the PMCA                                     | 0.3    | $\mu\text{M}$                   |
| $K_{\text{CE}}$ | sensitivity of the SOCC to $[\text{Ca}^{2+}]$ in the ER         | 8      | $\mu\text{M}$                   |

# Experimental data

Excised parotid gland lobules were loaded with 5  $\mu\text{M}$  fluo4 and mounted in a superfusion chamber on the stage of an Olympus FV1000 multiphoton microscope. The  $\text{Ca}^{2+}$  indicator was excited by a Mai Tai femtosecond pulsed laser at 880 nm and emission measured at  $>510$  nm. The lobule was exposed to the IP3-generating agonist, Carbachol (300 nM) resulting in the oscillatory changes in fluorescence observed for the duration of the agonist exposure. Figures 6 show the fluorescence ratio before and after the exposure of the cell to Carbachol. These data have been extracted from the video in the supporting material.



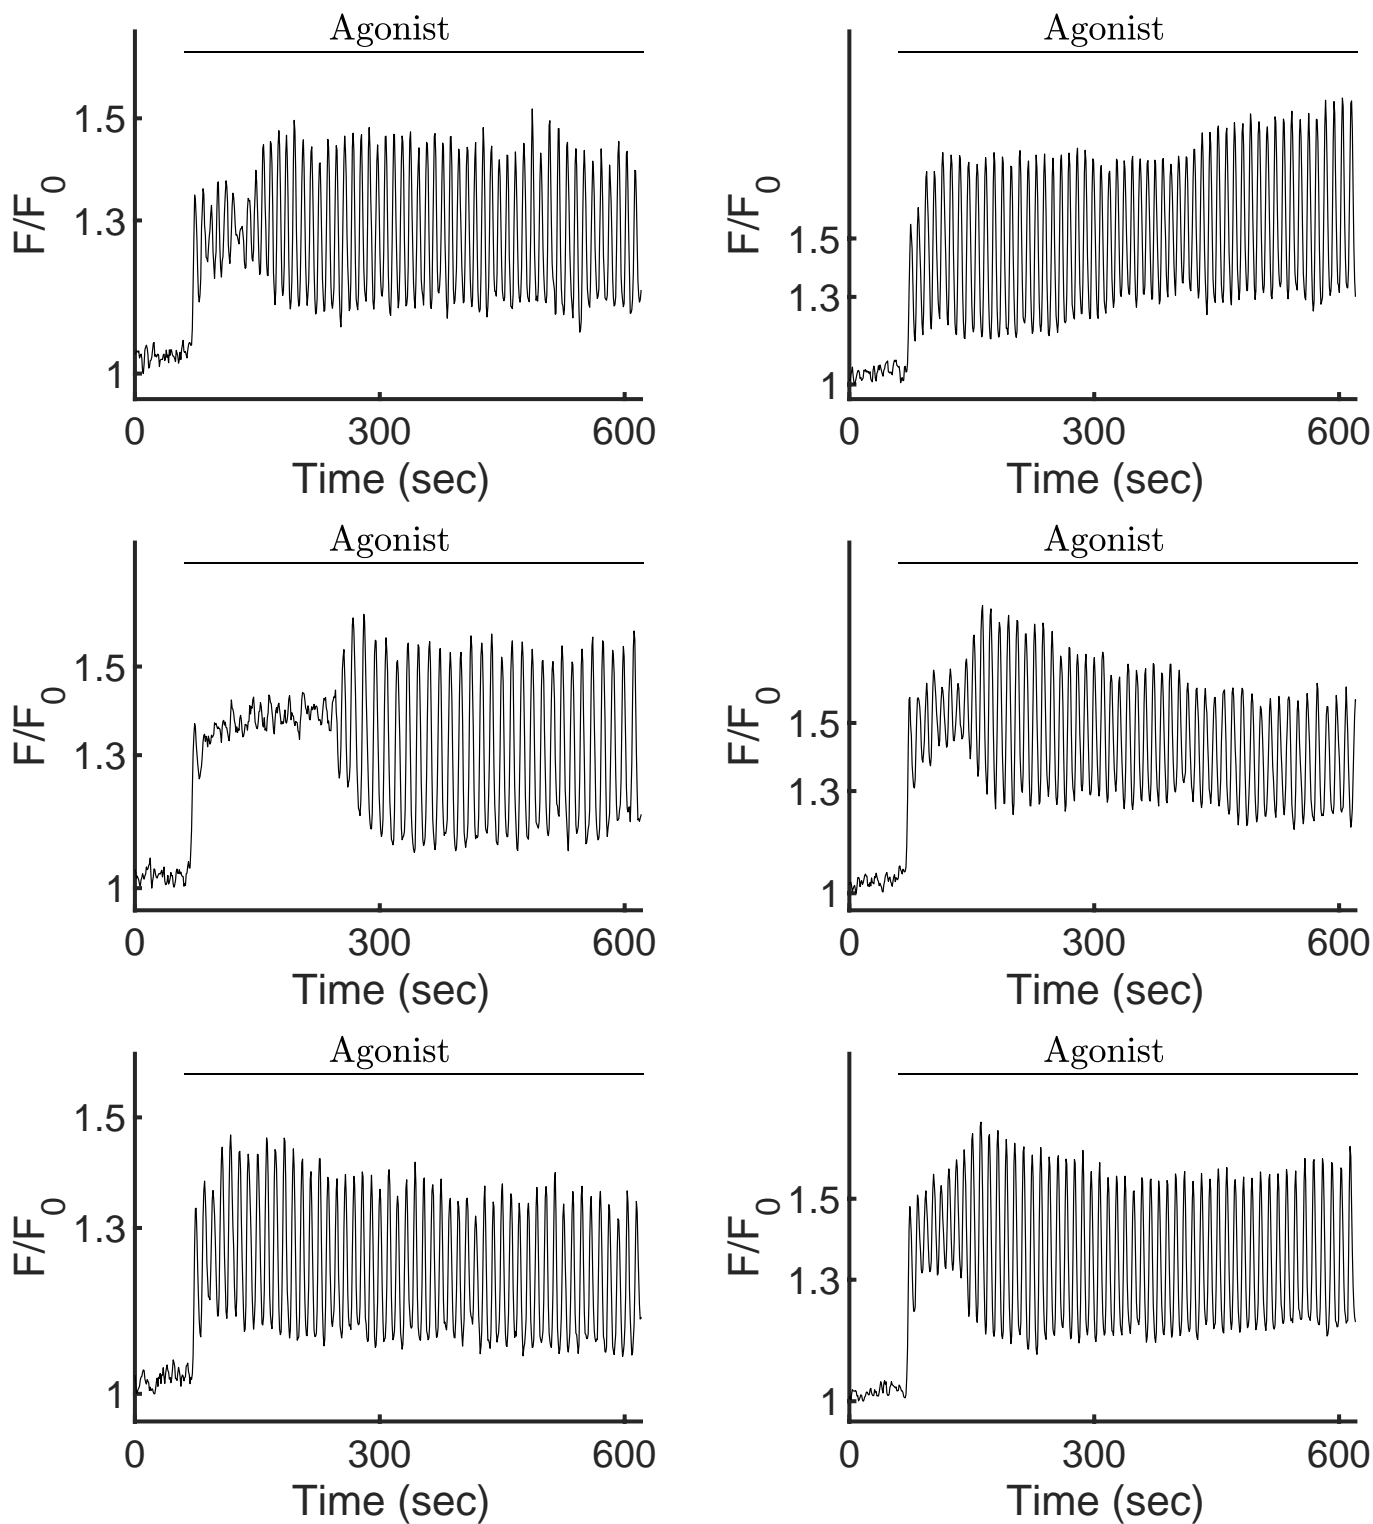

Figure 6: Time series of the mean fluorescence of the  $\text{Ca}^{2+}$ , in randomly chosen cells of the movie in the supporting material, indicator Fluo-4, averaged over the whole cell.  $\text{Ca}^{2+}$  oscillations appear after the exposure of the cell to Carbachol. These data have been extracted from a movie given in the supplementary material.

## References

- Pages N., Sigüenza E., Kirk V., Rugis J., Yule D., Sneyd J. (2018) A Model of Calcium Dynamics in an Accurate Reconstruction of Parotid Acinar Cells. To be submitted
- Sigüenza E., Pages N., J R., Yule D., Sneyd J. (2018) A Mathematical Model of Fluid Transport in an Accurate Reconstruction of a Parotid Acinar Cell. Submitted
